# Supplementary material for: Constructing Interconnected Hollow Mesopore Sn-Si Mixed Oxide Microspheres by Aerosol-Assisted Alkali Treatment with Enhanced Catalytic Performance in Baeyer-Villiger Oxidation
Source: MDPI journal article supplement (doi:10.3390/catal13121494), 2023-12-06
Supplement: s1 [file s1]

Supplementary Materials

# Constructing Interconnected Hollow Mesopore Sn-Si Mixed Oxide Microspheres by Aerosol-Assisted Alkali Treatment with Enhanced Catalytic Performance in Baeyer-Villiger Oxidation

Qingrun Meng \*, Xiaoxu Gao, Dezheng Li and Huimin Liu \*

Key Laboratory of Energy Chemical and Nano-Catalysis, School of Chemical and Environmental Engineering, Liaoning University of Technology, Jinzhou 121001, China; 18840177972@163.com (X.G.); ldz221882002@163.com (D.L.)

\* Correspondence: meng081015@lnut.edu.cn (Q.M.); liuhuimin08@tsinghua.org.cn (H.L.)

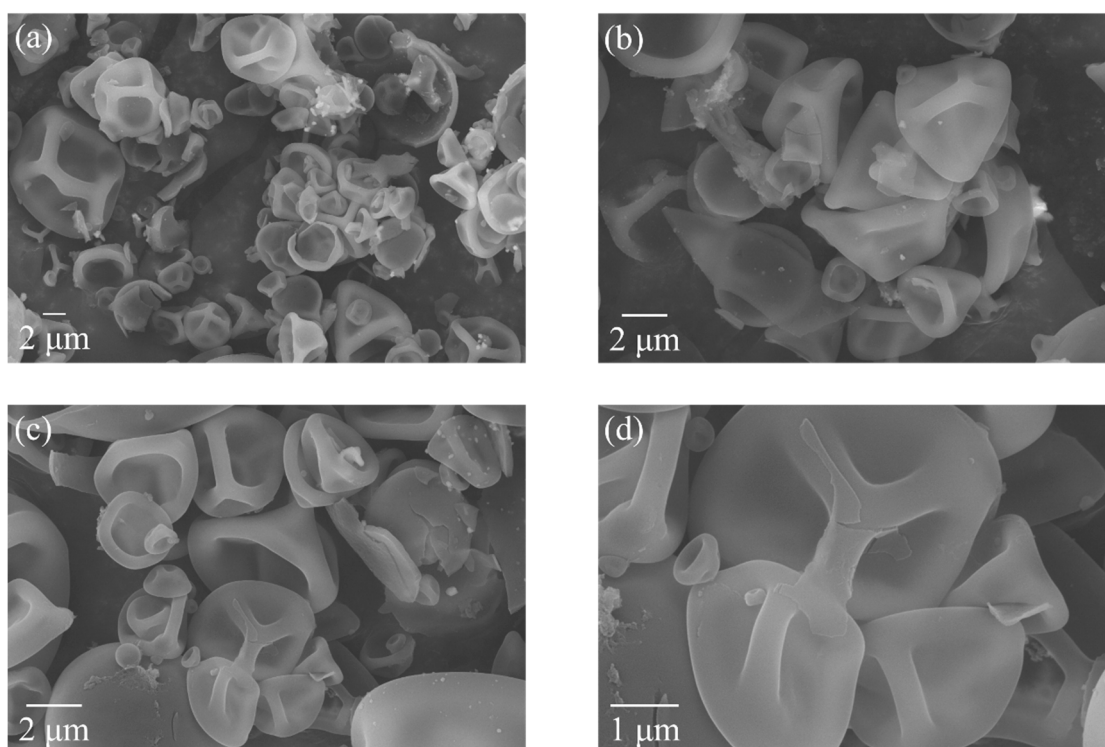

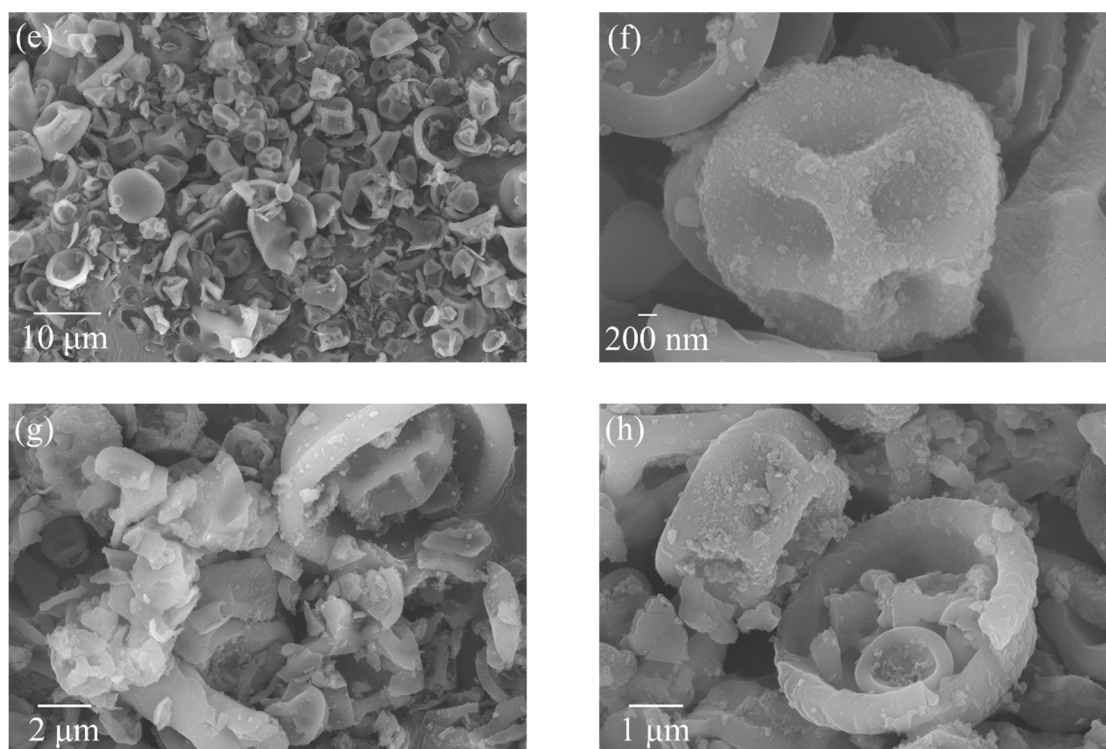

**Figure S1.** SEM image of Sn-Si-30-y-C series samples: (a,b) Sn-Si-30-0.05-C, (c,d) Sn-Si-30-0.1-C, (e,f) Sn-Si-30-0.3-C, (g,h) Sn-Si-30-0.5-C.

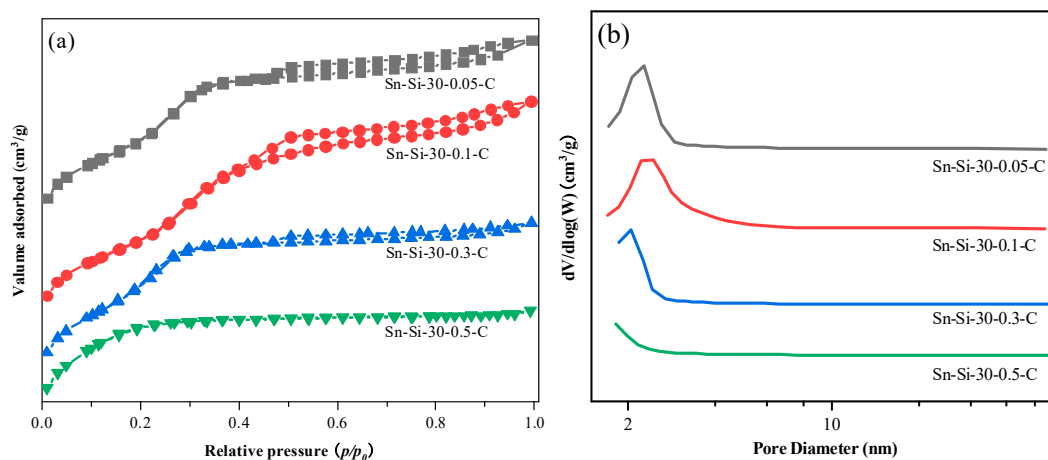

**Figure S2.** (a) N<sub>2</sub> adsorption-desorption isotherms and (b) BJH pore size distribution of the Sn-Si-30-y-C series samples.

**Table S1.** The textural properties of the Sn-Si-30-y-C series samples.

| Entry | sample          | $S_{BET}^a$<br>(m <sup>2</sup> /g) | $V_{total}^b$<br>(cm <sup>3</sup> /g) | $V_{meso}^c$<br>(cm <sup>3</sup> /g) | $V_{meso}/V_{total}$<br>% |
|-------|-----------------|------------------------------------|---------------------------------------|--------------------------------------|---------------------------|
| 1     | Sn-Si-30-0.05-C | 1124                               | 0.75                                  | 0.63                                 | 84                        |
| 2     | Sn-Si-30-0.1-C  | 1187                               | 0.87                                  | 0.79                                 | 90                        |
| 3     | Sn-Si-30-0.3-C  | 1037                               | 0.65                                  | 0.42                                 | 65                        |
| 4     | Sn-Si-30-0.5-C  | 911                                | 0.48                                  | 0.16                                 | 33                        |

<sup>a</sup> BET surface area; <sup>b</sup>  $p/p_0$ ; <sup>c</sup> mesoporous volume,  $V_{meso}=V_{total}-V_{micro}$ .

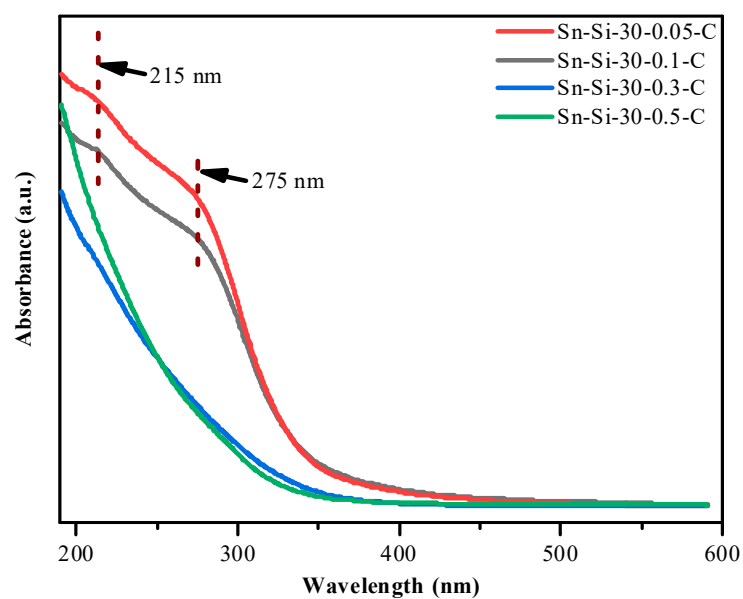

**Figure S3.** UV-Vis spectra of the Sn-Si-30-y-C series samples.

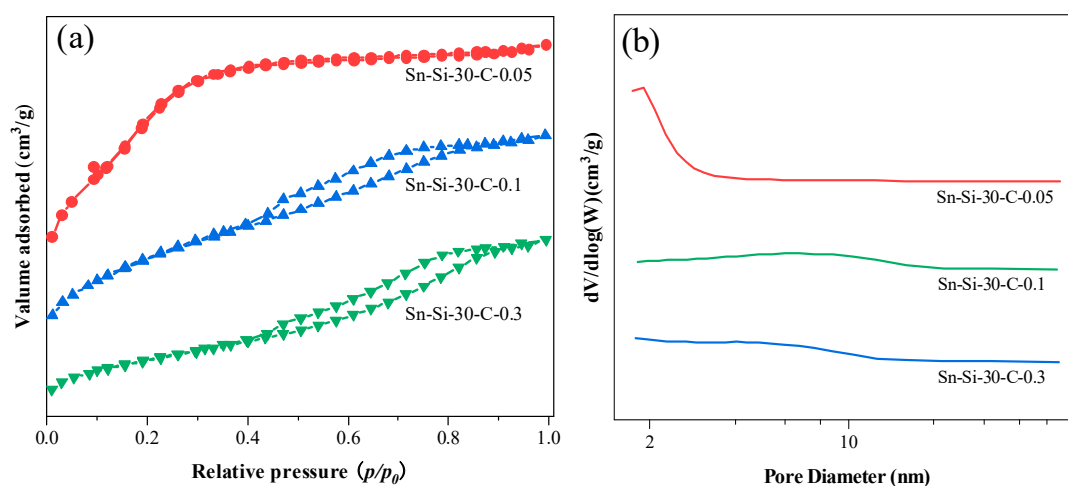

**Figure S4.** (a)  $N_2$  adsorption-desorption isotherms and (b) BJH pore size distribution of the Sn-Si-30-y-C series samples.

**Table S2.** The textural properties of the Sn-Si-30-C-y series materials.

| Entry | sample          | $S_{BET}^a$ | $V_{total}^b$ | $V_{meso}^c$ | $V_{meso}/V_{total}$ |
|-------|-----------------|-------------|---------------|--------------|----------------------|
|       |                 | ( $m^2/g$ ) | ( $cm^3/g$ )  | ( $cm^3/g$ ) | %                    |
| 1     | Sn-Si-30-C-0.05 | 1083        | 0.58          | 0.39         | 67                   |
| 2     | Sn-Si-30-C-0.1  | 549         | 0.47          | 0.38         | 80                   |
| 3     | Sn-Si-30-C-0.3  | 298         | 0.36          | 0.32         | 89                   |

<sup>a</sup> BET surface area; <sup>b</sup>  $p/p_0$ ; <sup>c</sup> mesoporous volume,  $V_{meso} = V_{total} - V_{micro}$ ;

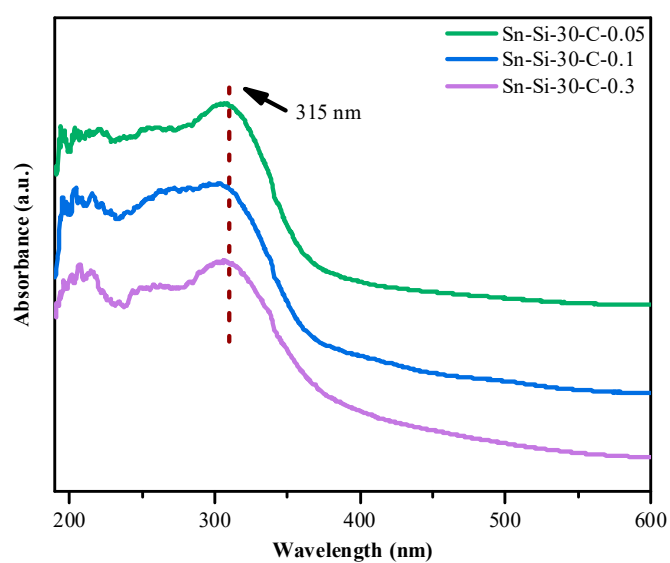

**Figure S5.** UV-Vis spectra of the Sn-Si-30-y-C series samples.

**Table S3.** The textural properties of the Sn-Si-90-0.1-C and Sn-Si-90-0.1-C-5.

| Entry | sample           | $S_{\text{BET}}$          | $V_{\text{total}}$         | $V_{\text{meso}}$          | $V_{\text{meso}}/V_{\text{total}}$ |
|-------|------------------|---------------------------|----------------------------|----------------------------|------------------------------------|
|       |                  | ( $\text{m}^2/\text{g}$ ) | ( $\text{cm}^3/\text{g}$ ) | ( $\text{cm}^3/\text{g}$ ) | %                                  |
| 1     | Sn-Si-90-0.1-C   | 1508                      | 0.89                       | 0.73                       | 83                                 |
| 4     | Sn-Si-90-0.1-C-5 | 1000                      | 0.51                       | 0.36                       | 71                                 |
